# Supplementary material
Source: MDPI journal article supplement (https://www.mdpi.com/1999-4907/14/6/1273)
Supplement: s1 [file s1]

**Table S2: Bavarian criteria catalog of recreational and therapeutic forests, BayKK KuH**

| Requirements for the certification of recreational and therapeutic forests based on the Bavarian BayKK KuH [19]                                                                                                                                         |                                                                                                                                                                                                                                   |                                                                                                                                                                                                      |
|---------------------------------------------------------------------------------------------------------------------------------------------------------------------------------------------------------------------------------------------------------|-----------------------------------------------------------------------------------------------------------------------------------------------------------------------------------------------------------------------------------|------------------------------------------------------------------------------------------------------------------------------------------------------------------------------------------------------|
| A. General requirements                                                                                                                                                                                                                                 |                                                                                                                                                                                                                                   |                                                                                                                                                                                                      |
| Literature: German Spas Association and German Tourism Association 2018, European Commission 2002, Hintzsche 2014, Hintzsche & Heinrichs 2017, Lupp et al. 2016, McGeeny 2016, Robl 2020, Stölb 2015, World Health Organization 2018, Zhang et al. 2021 |                                                                                                                                                                                                                                   |                                                                                                                                                                                                      |
| A1. Forest size                                                                                                                                                                                                                                         |                                                                                                                                                                                                                                   |                                                                                                                                                                                                      |
| Basic requirement                                                                                                                                                                                                                                       | Certified recreational forest                                                                                                                                                                                                     | Certified therapeutic forest                                                                                                                                                                         |
| <ul style="list-style-type: none"><li>Contiguous forest area with a quite zone and an activity zone</li></ul>                                                                                                                                           | <ul style="list-style-type: none"><li>Size quiet zone and activity zone: 6 to 12+ ha</li><li>Quiet zone: 2 to 4+ ha</li><li>Correspondingly more surface area in the case of disruptive influences from the environment</li></ul> |                                                                                                                                                                                                      |
| <b>Optimal/further development:</b> larger core zone with larger total area (depending on the intensity of use), inclusion of classified terrain trails, additional forest area                                                                         |                                                                                                                                                                                                                                   |                                                                                                                                                                                                      |
| A2. Assessability                                                                                                                                                                                                                                       |                                                                                                                                                                                                                                   |                                                                                                                                                                                                      |
| Basic requirement                                                                                                                                                                                                                                       | Certified recreational forest                                                                                                                                                                                                     | Certified therapeutic forest                                                                                                                                                                         |
| <ul style="list-style-type: none"><li>Reachability by foot or different transportation options</li><li>Assembly point/meeting place at forest edge</li></ul>                                                                                            | <ul style="list-style-type: none"><li>Attractive footpath connection to the recreational forest</li><li>Shuttle/public transport or mountain railway</li></ul>                                                                    | <ul style="list-style-type: none"><li>Short connections on foot or shuttle transportation</li></ul>                                                                                                  |
| A3. Topography/terrain                                                                                                                                                                                                                                  |                                                                                                                                                                                                                                   |                                                                                                                                                                                                      |
| Basic requirement                                                                                                                                                                                                                                       | Certified recreational forest                                                                                                                                                                                                     | Certified therapeutic forest                                                                                                                                                                         |
| <ul style="list-style-type: none"><li>Small-scale changing topography</li><li>Terrain as varied as possible</li></ul>                                                                                                                                   | <ul style="list-style-type: none"><li>Areas with moving relief</li><li>Different terrain gradient</li></ul>                                                                                                                       | <ul style="list-style-type: none"><li>Accessible forest areas on largely flat or slightly sloping surfaces</li><li>Sub-areas with max. 2% gradient</li><li>Partially barrier-free subareas</li></ul> |
| A4. Tranquility in the forest stand                                                                                                                                                                                                                     |                                                                                                                                                                                                                                   |                                                                                                                                                                                                      |
| Basic requirement                                                                                                                                                                                                                                       | Certified recreational forest                                                                                                                                                                                                     | Certified therapeutic forest                                                                                                                                                                         |
| <ul style="list-style-type: none"><li>Orienting sound level values of anthropogenic noise immission</li></ul>                                                                                                                                           | <ul style="list-style-type: none"><li>Quiet zone ≤ 35 dB(A) and activity zone ≤ 40 dB(A)</li></ul>                                                                                                                                | <ul style="list-style-type: none"><li>In the entire forest area ≤ 35 dB</li></ul>                                                                                                                    |

**Optimal/further development:** empirical assessment of noise exposure (psychoacoustic approach, soundwalks), noise-reducing design of the forest edge, measures for traffic calming or reduction of environmental noise, designation as "quiet area" according to EU Environmental Noise Directive

#### A5. Air purity in the forest stand

| Basic requirements                                                                                                                 | Certified recreational forest                                                                                      | Certified therapeutic forest |
|------------------------------------------------------------------------------------------------------------------------------------|--------------------------------------------------------------------------------------------------------------------|------------------------------|
| <ul style="list-style-type: none"> <li>In compliance with the guideline values for air quality in German health resorts</li> </ul> | <ul style="list-style-type: none"> <li>Forest location in an environment with the cleanest air possible</li> </ul> |                              |

**Optimal/further development:** measurement of air pollutants (NO<sub>x</sub>, ozone, fine dust, particle matters PM 10, PM2.5), BVOCs/phytonzides, forest microbiome in soil and air, mould spores

#### B. Forest-specific requirements

Literature: Bernasconi & Schroff 2008, Brämer 2008, 2010, Cervinka et al. 2020, Ciesielski & Stereńczak 2018, Coch 2002, Edwards et al. 2012, Grahn et al. 2010, Lupp et al. 2016, Stigsdotter et al. 2017, Stölz 2015

#### B1. Tree population

| Basic requirements                                                                                                                                                                                                                                                                                                   | Certified recreational forest                                            | Certified therapeutic forest                                                                                                                                                                                |
|----------------------------------------------------------------------------------------------------------------------------------------------------------------------------------------------------------------------------------------------------------------------------------------------------------------------|--------------------------------------------------------------------------|-------------------------------------------------------------------------------------------------------------------------------------------------------------------------------------------------------------|
| <ul style="list-style-type: none"> <li>Varied forest (deciduous forest, mixed forest, coniferous forest) with alternation of different tree species</li> <li>Change of different age groups</li> <li>Predominantly closed canopy</li> <li>Varied light conditions in the stand</li> <li>High biodiversity</li> </ul> | <ul style="list-style-type: none"> <li>See basic requirements</li> </ul> | <ul style="list-style-type: none"> <li>Therapy of respiratory tract diseases: Coniferous wood area with high amount of BVOC emission</li> <li>Development of partial areas with park-like design</li> </ul> |

**Optimal/further development of contrasting forest areas:** promotion of different tree species (coniferous, hardwood areas), clearance of individual trees and groups of trees, preservation of old-growth forests, promotion of unusually shaped trees, preservation of individual dense areas development of varied forest inner and outer edges

#### B2. Forest floor

| Basic requirements                                                                                                        | Certified recreational forest                                                    | Certified therapeutic forest                                                                                                       |
|---------------------------------------------------------------------------------------------------------------------------|----------------------------------------------------------------------------------|------------------------------------------------------------------------------------------------------------------------------------|
| <ul style="list-style-type: none"> <li>Varied forest floor with high structural diversity (roots, tree stumps)</li> </ul> | <ul style="list-style-type: none"> <li>Predominantly accessible areas</li> </ul> | <ul style="list-style-type: none"> <li>Accessible, easily walkable forest areas</li> <li>Areas with varied forest floor</li> </ul> |

|                                                                                                                                                                                                                                                                                      |                                                                                                        |                                                                                                                                                                                               |
|--------------------------------------------------------------------------------------------------------------------------------------------------------------------------------------------------------------------------------------------------------------------------------------|--------------------------------------------------------------------------------------------------------|-----------------------------------------------------------------------------------------------------------------------------------------------------------------------------------------------|
| <ul style="list-style-type: none"><li>Haptically interesting elements (e.g. moss cushion)</li></ul>                                                                                                                                                                                  |                                                                                                        |                                                                                                                                                                                               |
| <b>Optimal/further development:</b> waterbody/stream, sub-areas with high structural diversity, rocks, lying thick deadwood, rootstocks                                                                                                                                              |                                                                                                        |                                                                                                                                                                                               |
| B3. Special features                                                                                                                                                                                                                                                                 |                                                                                                        |                                                                                                                                                                                               |
| Basic requirements                                                                                                                                                                                                                                                                   | Certified recreational forest                                                                          | Certified therapeutic forest                                                                                                                                                                  |
| <ul style="list-style-type: none"><li>Presence of natural highlights, e.g. special areas of old trees, water surface (stream, waterfall, etc.), forest clearing/ forest meadow, viewpoint, vista or visual axis in the forest stand, ground monument, rock(s), sunken path</li></ul> | <ul style="list-style-type: none"><li>At least one distinctive nature “highlight”</li></ul>            |                                                                                                                                                                                               |
| <b>Optimal/further development:</b> additional prominent natural "highlights", contrast of highlight areas and normal forest image                                                                                                                                                   |                                                                                                        |                                                                                                                                                                                               |
| B4. Forest Images/Sensory Spaces                                                                                                                                                                                                                                                     |                                                                                                        |                                                                                                                                                                                               |
| Basic requirements                                                                                                                                                                                                                                                                   | Certified recreational forest                                                                          | Certified therapeutic forest                                                                                                                                                                  |
| <ul style="list-style-type: none"><li>“Perceived Sensory rooms” in the forest for multi-sensory experiences</li></ul>                                                                                                                                                                | <ul style="list-style-type: none"><li>Presence of 2-3 different forest images/sensory spaces</li></ul> | <ul style="list-style-type: none"><li>4 or more different forest images/ sensory spaces</li><li>Development of a sequence of different sensory rooms for different therapeutic uses</li></ul> |
| B5. Forest environment                                                                                                                                                                                                                                                               |                                                                                                        |                                                                                                                                                                                               |
| Basic requirements                                                                                                                                                                                                                                                                   | Certified recreational forest                                                                          | Certified therapeutic forest                                                                                                                                                                  |
| <ul style="list-style-type: none"><li>Buildings/infrastructure hardly noticeable from the forest area</li><li>Sufficient distance from power lines, mobile phone systems, wind turbines</li></ul>                                                                                    |                                                                                                        |                                                                                                                                                                                               |
| <b>Optimal/further development:</b> forest area surrounded by attractive open spaces (meadows, forest, orchards), view axes and views from the forest stand                                                                                                                          |                                                                                                        |                                                                                                                                                                                               |
| B6. Forest management                                                                                                                                                                                                                                                                |                                                                                                        |                                                                                                                                                                                               |
| Basic requirements                                                                                                                                                                                                                                                                   | Certified recreational forest                                                                          | Certified therapeutic forest                                                                                                                                                                  |

|                                                                                                                                                                                                                                                                                                                                                                                                                                          |                                                                                                                                                                                     |                                                                                                                                                                                                                                                                                                                                                      |
|------------------------------------------------------------------------------------------------------------------------------------------------------------------------------------------------------------------------------------------------------------------------------------------------------------------------------------------------------------------------------------------------------------------------------------------|-------------------------------------------------------------------------------------------------------------------------------------------------------------------------------------|------------------------------------------------------------------------------------------------------------------------------------------------------------------------------------------------------------------------------------------------------------------------------------------------------------------------------------------------------|
| <ul style="list-style-type: none"> <li>• Little traces of management (e.g. no conspicuous skid trails)</li> <li>• Increased road safety</li> <li>• Obligation small-scale rejuvenation of the stands</li> </ul>                                                                                                                                                                                                                          | <ul style="list-style-type: none"> <li>• Ongoing inspection and removal of trees and tree limbs that pose a safety hazard, especially around pathways and therapy areas.</li> </ul> | <ul style="list-style-type: none"> <li>• Ongoing inspection and removal of trees and tree limbs that pose a safety hazard, especially around pathways and therapy areas.</li> </ul>                                                                                                                                                                  |
| <b>Optimal/further development:</b> further development of the forest stand on the basis of the BayKK Therapy Forest and a long-term design concept.                                                                                                                                                                                                                                                                                     |                                                                                                                                                                                     |                                                                                                                                                                                                                                                                                                                                                      |
| <b>C. Infrastructure</b>                                                                                                                                                                                                                                                                                                                                                                                                                 |                                                                                                                                                                                     |                                                                                                                                                                                                                                                                                                                                                      |
| Literature: Brämer 2008, DIN 32984, DIN 18040-3, DIN 32975, Lupp et al. 2016, Marcus & Sachs 2014, Stölb 2015, Stigsdotter et al. 2018, Zhang et al. 2017.                                                                                                                                                                                                                                                                               |                                                                                                                                                                                     |                                                                                                                                                                                                                                                                                                                                                      |
| <b>C1. Trail network (hiking and forest trails)</b>                                                                                                                                                                                                                                                                                                                                                                                      |                                                                                                                                                                                     |                                                                                                                                                                                                                                                                                                                                                      |
| <b>Basic requirements</b>                                                                                                                                                                                                                                                                                                                                                                                                                | <b>Certified recreational forest</b>                                                                                                                                                | <b>Certified therapeutic forest</b>                                                                                                                                                                                                                                                                                                                  |
| <ul style="list-style-type: none"> <li>• Network of trails/paths in different lengths</li> <li>• Unsealed, "near-natural" floor covering</li> <li>• </li> </ul>                                                                                                                                                                                                                                                                          | <ul style="list-style-type: none"> <li>• Variation of trails/paths across the forest</li> <li>• Cycling and hiking trails only in the activity zone</li> </ul>                      | <ul style="list-style-type: none"> <li>• Barrier-free sections without stairs (see national regulation, e.g. German DIN 32984)</li> <li>• Hiking and terrain cure trails only in zone A</li> </ul>                                                                                                                                                   |
| <b>Optimal/further development:</b> narrow, winding, soft path (in forest stand), remove footpaths in the event of overdevelopment, visitor guidance concept, if applicable; specific therapy-supported design of individual pathways according to indications, indication of distance and route profile, floor indicators according to German regulation for visually impaired people (DIN 32984), design of barrier-free hiking trails |                                                                                                                                                                                     |                                                                                                                                                                                                                                                                                                                                                      |
| <b>C2. Structural assets</b>                                                                                                                                                                                                                                                                                                                                                                                                             |                                                                                                                                                                                     |                                                                                                                                                                                                                                                                                                                                                      |
| <b>Basic requirements</b>                                                                                                                                                                                                                                                                                                                                                                                                                | <b>Certified recreational forest</b>                                                                                                                                                | <b>Certified therapeutic forest</b>                                                                                                                                                                                                                                                                                                                  |
| <ul style="list-style-type: none"> <li>• Selective nature-based infrastructure within the forest</li> </ul>                                                                                                                                                                                                                                                                                                                              | <ul style="list-style-type: none"> <li>• Wooden seating at special points and places</li> </ul>                                                                                     | <ul style="list-style-type: none"> <li>• Rest zone: natural unobtrusive therapeutic facilities</li> <li>• Activity zone: permanently installed therapeutic facilities possible such as wooden exercise elements, yoga platform</li> <li>• Covered seating area with tables</li> <li>• Resting and seating facilities in the sun and shade</li> </ul> |
| <b>Optimal/feature development:</b> community square, mobile loungers/seats, hiding points, info point, mobile WC at the edge of the forest, varied resting and seating facilities (loungers, forest elements), also in the sun                                                                                                                                                                                                          |                                                                                                                                                                                     |                                                                                                                                                                                                                                                                                                                                                      |

| D. Health promotional, preventive and therapeutic interventions                                                                                                                                                                                                                                                                |                                                                                                                   |                                                                                                                                                                                                                                                                                                                                                                                   |
|--------------------------------------------------------------------------------------------------------------------------------------------------------------------------------------------------------------------------------------------------------------------------------------------------------------------------------|-------------------------------------------------------------------------------------------------------------------|-----------------------------------------------------------------------------------------------------------------------------------------------------------------------------------------------------------------------------------------------------------------------------------------------------------------------------------------------------------------------------------|
| Literature: Brüggemann 1980, Hupperts & Schatanek 2021, Schuh & Immich 2021, Schuh 2004, World Health Organization 2020                                                                                                                                                                                                        |                                                                                                                   |                                                                                                                                                                                                                                                                                                                                                                                   |
|                                                                                                                                                                                                                                                                                                                                | Certified recreational forest                                                                                     | Certified therapeutic forest                                                                                                                                                                                                                                                                                                                                                      |
| <b>D1. Specialized staff</b>                                                                                                                                                                                                                                                                                                   | <ul style="list-style-type: none"> <li>Forest Health Trainer: health Promotion and Prevention programs</li> </ul> | <ul style="list-style-type: none"> <li>Forest Health Trainer: health Promotion and Prevention programs</li> <li>Forest Therapist: medical therapeutic interventions</li> </ul>                                                                                                                                                                                                    |
| <b>D2. Area of use</b>                                                                                                                                                                                                                                                                                                         | <ul style="list-style-type: none"> <li>Rest zone (Zone R)</li> <li>Activity zone (Zone A)</li> </ul>              | <ul style="list-style-type: none"> <li>Rest zone (Zone R)</li> <li>Activity zone (Zone A)</li> <li>Various therapy places or therapy areas (Zone T)</li> </ul>                                                                                                                                                                                                                    |
| D3. Health promotional, preventive activities and therapeutic interventions                                                                                                                                                                                                                                                    |                                                                                                                   |                                                                                                                                                                                                                                                                                                                                                                                   |
| a) Forest Health Training                                                                                                                                                                                                                                                                                                      |                                                                                                                   | Zone R                                                                                                                                                                                                                                                                                                                                                                            |
| Basic requirements                                                                                                                                                                                                                                                                                                             | Certified recreational forest                                                                                     | Certified therapeutic forest                                                                                                                                                                                                                                                                                                                                                      |
| <ul style="list-style-type: none"> <li>Different forest images/ sensory spaces according to B4.</li> <li>Screened off, not visible, forest areas (hardly any public traffic)</li> <li>Coniferous forest area for breathing exercises</li> </ul>                                                                                | <ul style="list-style-type: none"> <li>Quiet area</li> </ul>                                                      | <ul style="list-style-type: none"> <li>Near-natural forest, special tranquility in the forest area</li> <li>Special privacy in the forest area</li> <li>Optional: Shady, sheltered seating</li> </ul>                                                                                                                                                                             |
| b) Climatotherapy                                                                                                                                                                                                                                                                                                              |                                                                                                                   |                                                                                                                                                                                                                                                                                                                                                                                   |
| Climatic terrain cure                                                                                                                                                                                                                                                                                                          |                                                                                                                   | Zone A or terrain cure trail network                                                                                                                                                                                                                                                                                                                                              |
| Basic requirements                                                                                                                                                                                                                                                                                                             | Certified recreational forest                                                                                     | Certified therapeutic forest                                                                                                                                                                                                                                                                                                                                                      |
| <ul style="list-style-type: none"> <li>General path network (hiking and forest paths)</li> <li>Extended well signposted trails</li> <li>Varied, winding routes with beautiful views</li> <li>If applicable, ascending and descending routes (sections)</li> <li>Length specification</li> <li>Partial accessibility</li> </ul> | <ul style="list-style-type: none"> <li>See basic requirements</li> </ul>                                          | <ul style="list-style-type: none"> <li>Certified terrain cure trail network with load levels, classification of performance-related and thermal load: geographical measurement according to length and gradient, determination of reference values for average load and expected walk time, assessment of climatic conditions and stimulus intensities, classification</li> </ul> |

|                                                                                                                                       |                                                                                                                                                                                         |                                                                                                                                                                                                                                  |
|---------------------------------------------------------------------------------------------------------------------------------------|-----------------------------------------------------------------------------------------------------------------------------------------------------------------------------------------|----------------------------------------------------------------------------------------------------------------------------------------------------------------------------------------------------------------------------------|
|                                                                                                                                       |                                                                                                                                                                                         | into levels of difficulty, standardization of the performance transfer to bicycle ergometer load (Watt levels)                                                                                                                   |
| <b>Fresh air rest cure</b>                                                                                                            |                                                                                                                                                                                         | <b>Zone R and A</b>                                                                                                                                                                                                              |
| <b>Basic requirements</b>                                                                                                             | <b>Certified recreational forest</b>                                                                                                                                                    | <b>Certified therapeutic forest</b>                                                                                                                                                                                              |
| <ul style="list-style-type: none"> <li>Lying/sitting possibilities under trees</li> <li>Forest areas that are out of sight</li> </ul> | <ul style="list-style-type: none"> <li>Quite area</li> </ul>                                                                                                                            | <ul style="list-style-type: none"> <li>Quiet area</li> <li>Optional: wooden seats placed in the shade, blankets/shelters if necessary.</li> <li>Climate pavilion at the edge of the forest</li> </ul>                            |
| <b>Heliotherapy</b>                                                                                                                   |                                                                                                                                                                                         | <b>Zone R and A</b>                                                                                                                                                                                                              |
| <b>Basic requirements</b>                                                                                                             | <b>Certified recreational forest</b>                                                                                                                                                    | <b>Certified therapeutic forest</b>                                                                                                                                                                                              |
| <ul style="list-style-type: none"> <li>Light/open area for dosed sunbathing</li> </ul>                                                | <ul style="list-style-type: none"> <li>Optional: sun lounges in Zone A</li> </ul>                                                                                                       | <ul style="list-style-type: none"> <li>Sun lounges</li> <li>Seating in different seat heights</li> </ul>                                                                                                                         |
| <b>c) Sport and exercise training/therapy</b>                                                                                         |                                                                                                                                                                                         | <b>Zone A</b>                                                                                                                                                                                                                    |
| <b>Basic requirements</b>                                                                                                             | <b>Certified recreational forest</b>                                                                                                                                                    | <b>Certified therapeutic forest</b>                                                                                                                                                                                              |
| <ul style="list-style-type: none"> <li>Flat open area for exercise units</li> <li>Soft, uneven forest floor</li> </ul>                | <ul style="list-style-type: none"> <li>Optional: wooden exercise elements, e.g. floor installations made of wood (yoga platform)</li> <li>Timbers for strengthening training</li> </ul> | <ul style="list-style-type: none"> <li>Hiking trails</li> <li>Tracks with a varied ground profile</li> <li>Moss cushion/soft flooring</li> <li>Optional: barefoot path, sensorimotor path, natural training materials</li> </ul> |
| <b>d) Kneipp therapy</b>                                                                                                              |                                                                                                                                                                                         | <b>Zone A</b>                                                                                                                                                                                                                    |
| <b>Basic requirements</b>                                                                                                             | <b>Certified recreational forest</b>                                                                                                                                                    | <b>Certified therapeutic forest</b>                                                                                                                                                                                              |
| <ul style="list-style-type: none"> <li>Water body with safe access, e.g. natural stream</li> </ul>                                    | <ul style="list-style-type: none"> <li>Optional: Kneipp basin</li> </ul>                                                                                                                | <ul style="list-style-type: none"> <li>Accessible stream</li> <li>Kneipp basin (in the cure garden)</li> <li>Different „sensory rooms“</li> <li>Moss cushion</li> <li>Optional: forest herbal patch</li> </ul>                   |
| <b>e) Body Mind Procedures (Tai Chi, Qigong, Yoga)</b>                                                                                |                                                                                                                                                                                         | <b>Zone A and T</b>                                                                                                                                                                                                              |

| Basic requirements                                                                                                                                    | Certified recreational forest                                            | Certified therapeutic forest                                                                                                                                     |
|-------------------------------------------------------------------------------------------------------------------------------------------------------|--------------------------------------------------------------------------|------------------------------------------------------------------------------------------------------------------------------------------------------------------|
| <ul style="list-style-type: none"> <li>Flat open forest areas</li> <li>Stable forest floor</li> <li>Forest clearing</li> <li>Forest meadow</li> </ul> | <ul style="list-style-type: none"> <li>See basic requirements</li> </ul> | <ul style="list-style-type: none"> <li>Screened off, out of sight area</li> <li>Optional: wooden platform(s)</li> </ul>                                          |
| <b>f) Psychotherapy</b>                                                                                                                               |                                                                          | <b>Zone R and T</b>                                                                                                                                              |
| Basic requirements                                                                                                                                    | Certified recreational forest                                            | Certified therapeutic forest                                                                                                                                     |
| <ul style="list-style-type: none"> <li>Mixed forest with high bio-diversity</li> </ul>                                                                | ---                                                                      | <ul style="list-style-type: none"> <li>Optional: orientation aids</li> </ul>                                                                                     |
| <b>g) Respiratory therapy</b>                                                                                                                         |                                                                          | <b>Zone A and R</b>                                                                                                                                              |
| Basic requirements                                                                                                                                    | Certified recreational forest                                            | Certified therapeutic forest                                                                                                                                     |
|                                                                                                                                                       | ---                                                                      | <ul style="list-style-type: none"> <li>Predominantly coniferous forest</li> <li>Low allergenic vegetation</li> </ul>                                             |
| <b>h) Occupational therapy and physiotherapy</b>                                                                                                      |                                                                          | <b>Zone A and T</b>                                                                                                                                              |
| Basic requirements                                                                                                                                    | Certified recreational forest                                            | Certified therapeutic forest                                                                                                                                     |
| <ul style="list-style-type: none"> <li>Mixed forest with different sensory spaces</li> <li>loose, natural materials</li> </ul>                        | ---                                                                      | <ul style="list-style-type: none"> <li>Optional: hut with tools and auxiliary materials</li> <li>Areas for handcraft work</li> <li>Table with benches</li> </ul> |
| <b>i) Art therapy</b>                                                                                                                                 |                                                                          | <b>All zone</b>                                                                                                                                                  |
| Basic requirements                                                                                                                                    | Certified recreational forest                                            | Certified therapeutic forest                                                                                                                                     |
| <ul style="list-style-type: none"> <li>Mixed forest with high biodiverse vegetation</li> <li>Different „sensory rooms“</li> </ul>                     | ---                                                                      | <ul style="list-style-type: none"> <li>Optional: protected individual places</li> <li>Hut with auxiliary materials Seating with tables</li> </ul>                |
