# Supplementary material
Source: MDPI journal article supplement (https://www.mdpi.com/1999-4907/14/6/1273)
Supplement: s1 [file s1]

**Health resort: XXX**

**Target:** ☒ Recreational forest ☐ Therapeutic forest

General evaluation scheme (1 - 4) - detailed criteria are defined for each factor

1 (red) = insufficient, not fulfilled, unclear, no

2 (yellow) = need for optimization / limitations present, unclear = status: under development

3 (light green) = good, sufficiently clarified resp. yes

4 (dark green) = optimal resp. very good, completely fulfilled resp. yes

| No. | Parameter                                             | Forest area 1                                                                                                                                                           | Forest area 2                                                                                                                                                           | Alternative LMU                                                                                                                                                         | Comment |
|-----|-------------------------------------------------------|-------------------------------------------------------------------------------------------------------------------------------------------------------------------------|-------------------------------------------------------------------------------------------------------------------------------------------------------------------------|-------------------------------------------------------------------------------------------------------------------------------------------------------------------------|---------|
|     |                                                       | Area 1                                                                                                                                                                  | Area 2                                                                                                                                                                  | Area 3                                                                                                                                                                  |         |
| 1   | Forest size (ha)                                      |                                                                                        |                                                                                        |                                                                                      |         |
|     | Forest in % of total area                             | 100 %                                                                                                                                                                   | 100 %                                                                                                                                                                   | 100 %                                                                                                                                                                   |         |
| 2   | Ownership                                             |                                                                                        |                                                                                        |   |         |
| 3   | Reachability (distance from center)                   |                                                                                        |                                                                                        |                                                                                      |         |
| 4   | Tranquility in the forest interior                    |                                                                                        |       |   |         |
| 5   | Privacy                                               |                                                                                       |                                                                                       |                                                                                     |         |
| 6   | Accessability/Walkability                             |   |                                                                                      |                                                                                    |         |
| 7   | Forest aesthetics factor according to Stölb (2016)    |                                                                                                                                                                         |                                                                                                                                                                         |                                                                                                                                                                         |         |
| 7a  | Species/structural diversity in the forest/tree stand |                                                                                      |                                                                                      |                                                                                    |         |
| 7b  | Species/structural diversity on the forest floor      |                                                                                      |                                                                                      |                                                                                    |         |
| 7c  | Topography/small relief in the inventory              |                                                                                      |                                                                                      |                                                                                    |         |
| 8   | Occurrence of special features/highlights             |                                                                                      |                                                                                      |                                                                                    |         |
| 9   | Forest management                                     |                                                                                      |                                                                                      |                                                                                    |         |
| 10  | Occurrence of conflicts, sources of danger            |                                                                                      |   |                                                                                    |         |
| 11  | Forest environment                                    |                                                                                      |                                                                                      |                                                                                    |         |

**Conclusion:**

Forest area 1 must be excluded for certification due to the increased noise pollution. Forest areas 2 and 3 are suitable for the designation of a recreational and therapeutic forest, if all designation requirements (development of a preventive or therapeutic concept, training of medical staff) are met.
