# Supplementary material
Source: MDPI journal article supplement (https://www.mdpi.com/1999-4907/14/6/1273)
Supplement: s1 [file s1]

Archive with 2 entries (2 files):
- Supplementary Table S1_Rating matrix of inspected forests.pdf
- Supplementary Table S2_Bavarian criteria catalogue in detail (BayKK KuH)_GI 14.06.23.pdf
